# Supplementary material for: A water-responsive molecule realizes stable Ah-scale Zn–I 2 pouch cells with high Zn utilization
Source: Royal Society of Chemistry journal article supplement (doi:10.1039/d5ee06986f), 2026-01-01
Supplement: d5ee06986f1.pdf [file d5ee06986f1.pdf]

## Supplementary Information

### **Water-Responsive Molecule Realizes Stable Ah-Scale Zn–I<sub>2</sub> Pouch Cells with High Zn Utilization**

Yiyang Hu,<sup>‡a</sup> Shao-Jian Zhang,<sup>‡a</sup> Han Wu,<sup>a</sup> Qianru Chen,<sup>a</sup> Pengfang Zhang,<sup>b</sup> Junnan Hao,<sup>\*a</sup> Shi-Zhang Qiao<sup>\*a</sup>

<sup>a</sup> School of Chemical Engineering, The University of Adelaide, Adelaide, SA 5005, Australia

<sup>b</sup> School of Chemistry and Chemical Engineering, Liaocheng University, Liaocheng 252000, P. R. China

\*Corresponding author: [junnan.hao@adelaide.edu.au](mailto:junnan.hao@adelaide.edu.au), [s.qiao@adelaide.edu.au](mailto:s.qiao@adelaide.edu.au)

<sup>‡</sup> These authors contributed equally to this work.

## 1. Experimental Procedures

### 1.1 Chemical reagent

Ectoine (Ect,  $C_6H_{10}N_2O_2$ ,  $\geq 98.0\%$ ) was purchased from Beijing InnoChem Science & Technology Co., Ltd. Zinc sulfate heptahydrate ( $ZnSO_4 \cdot 7H_2O$ ,  $\geq 99.0\%$ ), iodine ( $I_2$ ,  $\geq 99.99\%$ ), sodium iodide (NaI,  $\geq 99.0\%$ ), potassium iodide (KI,  $\geq 99.0\%$ ), sodium sulfate ( $Na_2SO_4 \cdot 7H_2O$ ,  $\geq 99.0\%$ ) and polytetrafluoroethylene (PTFE) aqueous dispersion (60 wt.% solid content) were purchased from Sigma-Aldrich. Zn foils, Cu foils, Ketjenblack (KB), titanium mesh (100 mesh) were provided by Canrd New Energy Technology Co., Ltd. The glass fiber (GF/A 2916, Olegeeino) was provided by Chongqing Olegee Technology Co., Ltd.

### 1.2 Electrolyte preparation

The base  $ZnSO_4$  electrolyte was prepared by dissolving  $ZnSO_4 \cdot 7H_2O$  in deionized water with the concentrations of 2 M. Ect electrolytes with varying concentrations (0.5 wt.%, 5 wt.%, 10 wt.%, 20 wt.%, and 35 wt.%, calculated based on electrolyte mass) were prepared by adding the corresponding amount of Ect to 2 M  $ZnSO_4$  electrolyte. The optimized Ect concentration was determined to be 5 wt.%.

### 1.3 Preparation of KB- $I_2$ electrodes

KB and  $I_2$  were mixed at a 3:7 mass ratio and manually ground for 10 min. The mixture was then hermetically sealed in a quartz tube and subjected to thermal treatment at 80 °C for 6 h, resulting in the formation of KB- $I_2$  composite powder. For KB- $I_2$  electrode preparation, the KB- $I_2$  composite powder was blended with KB and PTFE in a mass ratio of 8:1:1. The mixture was then compressed onto a Ti mesh and dried at 40 °C for 2 h to eliminate any residual solvents. For Zn- $I_2$  coin cells, the  $I_2$  loading in the cathodes was controlled within the range of 7–10  $mg_{iodine} cm^{-2}$ , while for Zn- $I_2$  pouch cells, a higher  $I_2$  loading of 19–20  $mg_{iodine} cm^{-2}$  was employed. Notably, all reported  $I_2$  loadings refer to the amount calculated per single side of the cathode.

### 1.4 Electrochemical measurements

To evaluate the CE of the Zn anode, a Zn || Cu asymmetric cell was assembled. During the test, Zn was plated onto a Cu foil (19 mm in diameter) at a predetermined current density, followed by stripping at the same current density until the voltage reached 0.8 V. To investigate the stability of the Zn plating/stripping process, a Zn || Zn symmetric cell was assembled using two Zn foils (16 mm in diameter), with glass fibers (19 mm in diameter) as a separator. For Zn- $I_2$  coin cells, KB- $I_2$  electrodes were paired with Zn foil and assembled as CR2032 coin cells, where glass fibers served as

the separator and either pure 2 M ZnSO<sub>4</sub> or Ect electrolyte was used as the electrolyte. GCD measurements of Zn–I<sub>2</sub> coin cells were conducted using a battery test system (CT-4008T, Neware, China) within a voltage range of 0.6–1.6 V. All current densities were calculated based on the mass of I<sub>2</sub>. CV measurements were performed using an electrochemical workstation (CHI660E, Chenhua, China). To evaluate Zn plating/stripping under 50% ZUR, Zn || Cu asymmetric cells were assembled using Zn foils (16 mm in diameter) and Cu foils (19 mm in diameter). Prior to cycling, the Cu electrodes were pre-activated at 2 mA cm<sup>-2</sup> and 1 mAh cm<sup>-2</sup> for 20 cycles. Subsequently, 4 mAh cm<sup>-2</sup> of Zn was pre-deposited onto the Cu foil at a current density of 2 mA cm<sup>-2</sup>. During subsequent cycling, the Zn || Cu asymmetric cells with Zn pre-deposited Cu electrodes were cycled at 2 mA cm<sup>-2</sup> and 2 mAh cm<sup>-2</sup>. For Zn plating/stripping under 70% ZUR, after pre-depositing the same amount of Zn, the Zn || Cu asymmetric cells were cycled at 2 mA cm<sup>-2</sup> and 2.8 mAh cm<sup>-2</sup>.

The single-layer Zn–I<sub>2</sub> pouch cells with limited Zn supply were assembled by stacking one double-side coated KB–I<sub>2</sub> electrodes (70 × 80 mm) with two Zn-plated Cu foils (72 × 82 mm). The Zn-plated Cu foils (Zn@Cu) were prepared in a galvanic bath filled with Ect electrolyte, where Zn deposition was carried out at a current density of 6.6 mA cm<sup>-2</sup> to achieve the required Zn capacity. Glass fibers were used as the separator, while 2 M ZnSO<sub>4</sub> (base) or Ect electrolyte served as the electrolyte. The KB–I<sub>2</sub> electrodes for pouch cells were fabricated by pressing a mixture of KB–I<sub>2</sub>, KB, and PTFE onto both sides of a titanium mesh current collector. The electrochemical performance of the Zn–I<sub>2</sub> pouch cells was evaluated within a voltage range of 0.6–1.6 V using the battery test system (CT-4008T, Netware, Shenzhen, China) under the ambient conditions.

The multi-layer Zn–I<sub>2</sub> pouch cells were assembled by stacking two double-sided KB–I<sub>2</sub> cathodes (80 × 90 mm) with three Zn@Cu anodes (82 × 92 mm, comprising two single-sided Zn@Cu and one double-sided Zn@Cu anode). Glass fiber and the Ect electrolyte served as the separators and electrolytes, respectively. The electrochemical performance was measured within the voltage range of 0.6–1.6 V using the same battery test system under ambient conditions.

The self-discharge rate was evaluated using the following protocol: (1) Each cell was first charged galvanostatically at 1 C to 1.6 V. The charge capacity was recorded as C<sub>1</sub>, and the cell voltage at the beginning of the rest period was recorded as V<sub>1</sub>. (2) The cell was then rested under open-circuit conditions for a predefined duration (0.5, 1, 2, 6, 12, 24, and 48 h). The cell voltage at the end of the rest period was recorded as V<sub>2</sub>. (3) After the rest period, the cell was discharged galvanostatically at 1 C to 0.6 V, and the discharge capacity was recorded as C<sub>2</sub>. (4) To minimize potential bias arising from interfacial instability after prolonged resting, the cell was further cycled for 5 cycles at 2 C

between 0.6 and 1.6 V before proceeding to the next self-discharge interval. Based on these measurements, the self-discharge rate was defined as  $C_2/C_1$ , and the voltage drop during the rest period was calculated as  $V_1 - V_2$ .

## 2. Characterization Techniques

XRD patterns were collected using a Rigaku Ultima IV X-ray diffractometer with Cu K $\alpha$  radiation ( $\lambda = 1.5418 \text{ \AA}$ ). Field emission scanning electron microscopy (FE-SEM, Hitachi SU 8010) was used to observe sample morphology, while EDS was employed for elemental analysis. To examine the cross-sectional morphology of Zn, Leica EM TIC 3X ion beam milling technology was used to expose the sample cross-sections. UV-Vis spectroscopy was conducted on a Shimadzu UV-2600i spectrophotometer. XPS measurements were performed using a Thermo Fisher Scientific K-Alpha X-ray photoelectron spectrometer with Al K $\alpha$  X-ray source. The binding energies were calibrated against the C-C peak at 284.8 eV. FTIR spectroscopy was recorded on a Nicolet iS50 spectrometer.  $^1\text{H}$  NMR spectra of the mixed Ect/triiodide solutions were collected on a Bruker AVANCE III 300 MHz spectrometer at 298 K and samples were prepared in 90 vol.%  $\text{H}_2\text{O}$ /10 vol.%  $\text{D}_2\text{O}$  and transferred into NMR tubes.

Raman spectroscopy was conducted using a Renishaw inVia Raman microscope with a 532 nm wavelength laser. *In situ* Raman spectra of electrodes were obtained using a two-electrode Raman cell (Gaoss Union, B002-RM). Zn-I $_2$  cells were galvanostatically charged and discharged using an electrochemical workstation (CHI660E, Chenhua, China). Raman spectra were collected through the quartz window of the Raman cell using a Raman microscope.

*In situ* UV-Vis spectroscopy was performed to monitor the dissolution behavior of polyiodides. A custom-designed quartz cell was prepared by adhering KB-I $_2$  electrodes and Zn anodes to the rough sides of the quartz cell. The cell was then filled with 3 mL of electrolyte (base or Ect). GCD cycling of the quartz battery was conducted using an electrochemical workstation (CHI660E, Chenhua, China) over a voltage range of 0.6–1.6 V. UV-Vis spectra were collected in real time to monitor the polyiodide dissolution during the cycling process.

*In situ* differential electrochemical mass spectrometry (DEMS) was conducted on an online DEMS system (HPR-40, Hiden Analytical) to monitor gas evolution during electrochemical processes using a modified DEMS cell. The pressure difference between the electrochemical cell and the vacuum chamber enabled the generated  $\text{H}_2$  to be continuously extracted into the vacuum chamber for mass-spectrometric analysis. The working electrode consisted of a 50 nm Au film sputtered onto a PTFE membrane (pore size: 0.02  $\mu\text{m}$ ). An Ag/AgCl electrode (Pine Research) and a Pt wire were

used as reference and counter electrodes, respectively. During measurements, linear sweep voltammetry (LSV) was conducted from 0 to  $-1.2$  V (vs. Ag/AgCl) at a scan rate of  $5 \text{ mV s}^{-1}$  using an electrochemical workstation (CHI660E, Chenhua, Shanghai). Gas species released during the cathodic scan were continuously transferred to the vacuum chamber and analyzed by the mass spectroscopy.

### 3. Theoretical Calculations

MD simulations were performed using the GROMACS package. The simulations employed the Amber03 force and the TIP3P water model. The systems underwent energy minimization and equilibration under the NPT ensemble, followed by production runs of 10 ns under the canonical ensemble. Temperature coupling to 298 K was achieved using the Nose-Hoover method, and pressure was coupled to 1 atm using the Parrinello-Rahman method. A cutoff scheme of 1.2 nm was applied for non-bonded interactions, and the Particle Mesh Ewald method with a Fourier spacing of 0.1 nm was used for long-range electrostatic interactions. The LINCS algorithm was used to constrain all covalent bonds involving hydrogen atoms. The electrostatic potential was calculated by ORCA package. The structural relaxation, single-point energy calculations, were performed under the B3LYP-D3/def2-TZVP.

All DFT calculations were performed using the Gaussian 16 software package.<sup>1</sup> Geometry optimizations were carried out at the B3LYP<sup>2</sup>/def2-TZVP<sup>3</sup> level of theory, incorporating Grimme's DFT-D3 dispersion correction<sup>4,5</sup> to account for long-range van der Waals interactions. Default convergence thresholds were employed, with maximum force and displacement criteria set to  $<0.00045$  Hartree/Bohr and  $<0.0018 \text{ \AA}$ , respectively. Harmonic vibrational frequency analyses were conducted at the same level of theory to confirm that the optimized structures correspond to true minima on the potential energy surface, as indicated by the absence of imaginary frequencies ( $\nu > 0 \text{ cm}^{-1}$ ). Typically, the conversion from “\*+I<sub>5</sub>” to “\*I<sub>5</sub>” represents the adsorption of I<sub>5</sub> species.

To ensure theoretical consistency, single-point energy calculations were performed on the optimized geometries using the same B3LYP/def2-TZVP level. The binding energy (BE) between interacting species was calculated according to the following equation:

$$\text{BE} = E_{\text{complex}} - (E_a + E_b) \quad (\text{Equation 1})$$

where  $E_{\text{complex}}$  is the total energy of the optimized supramolecular complex, and  $E_a$  and  $E_b$  represent the energies of the isolated components in their optimized geometries.

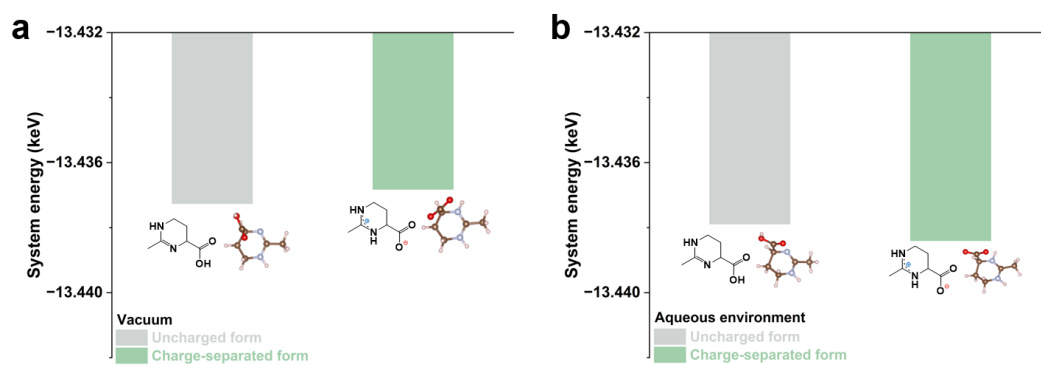

**Fig. S1** DFT-calculated energies of Ect in the uncharged and charge-separated states in (a) vacuum and (b) aqueous environment.

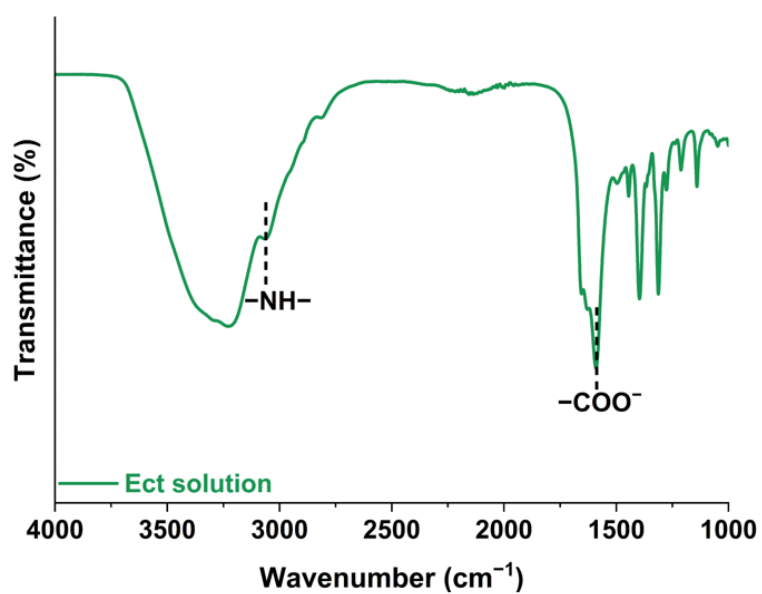

**Fig. S2** FTIR spectra of Ect aqueous solution.

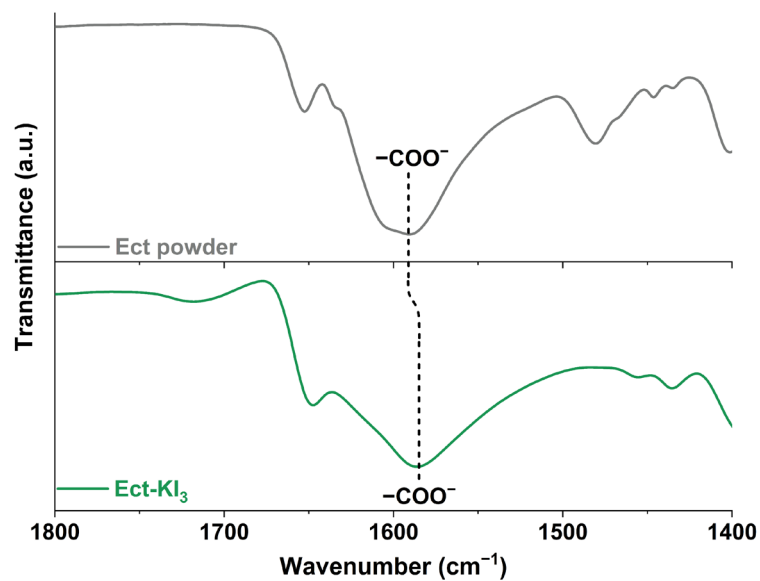

**Fig. S3** FTIR spectra of Ect powder and the Ect-KI<sub>3</sub> mixture in the range of 1800–1400 cm<sup>-1</sup>.

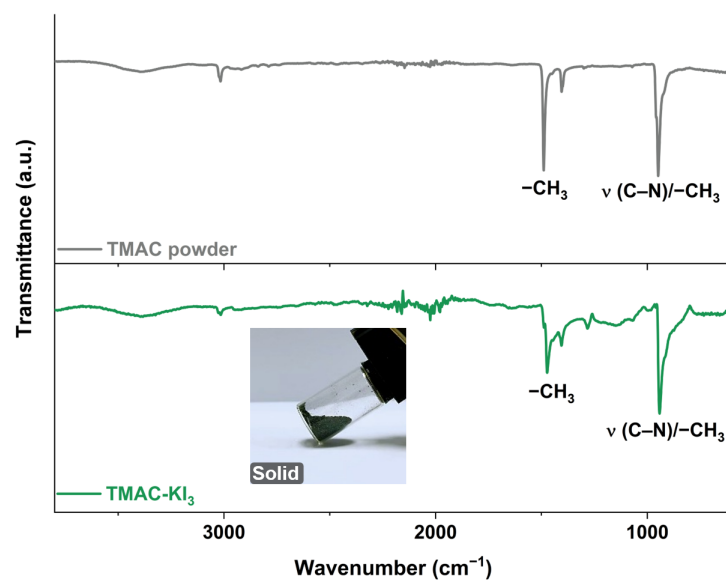

**Fig. S4** FTIR spectra of TMAC powder and the TMAC-KI<sub>3</sub> mixture in the range of 3800–600 cm<sup>-1</sup> (insets: digital photographs of the TMAC-KI<sub>3</sub> mixture after heating to 80 °C).

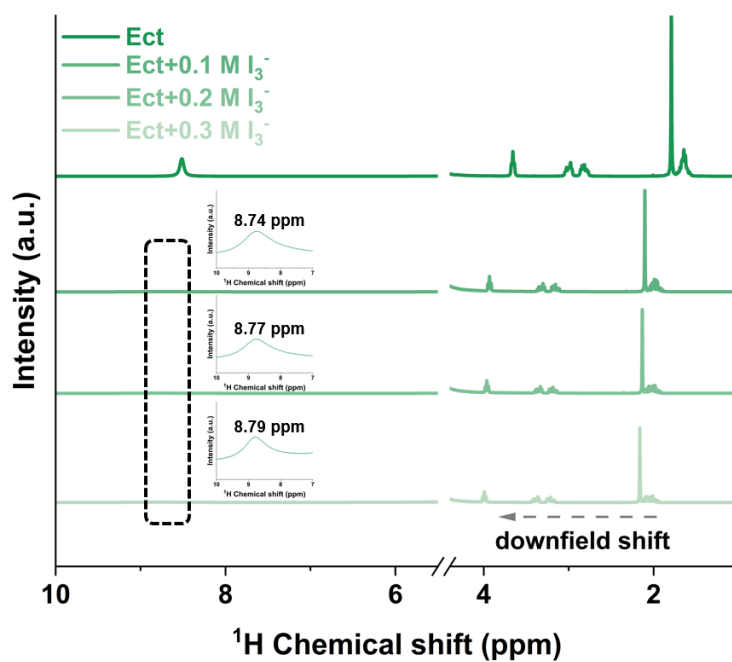

**Fig. S5**  $^1\text{H}$  NMR spectra of Ect solutions with different  $\text{I}_3^-$  concentrations (insets: expanded view of the  $^1\text{H}$  chemical shift region from 10 to 7 ppm).

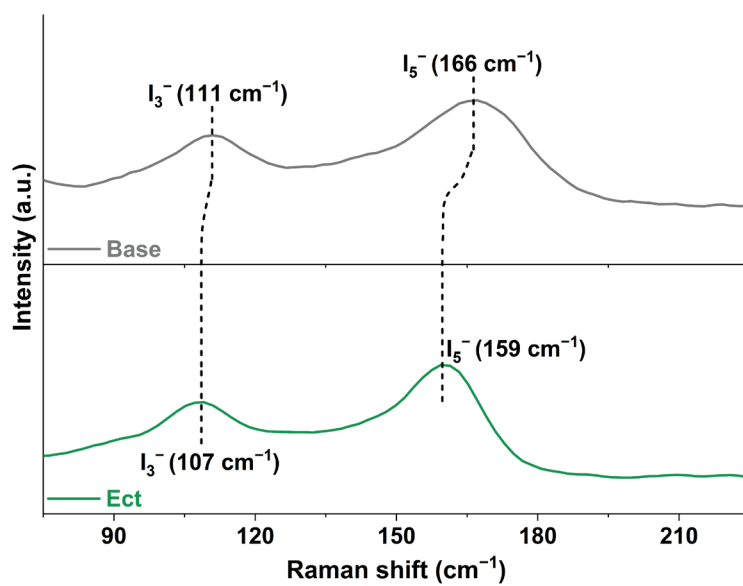

**Fig. S6** Ramans spectra of  $\text{KI}_3$  and the Ect- $\text{KI}_3$  mixture dissolved in  $\text{ZnSO}_4$  solution.



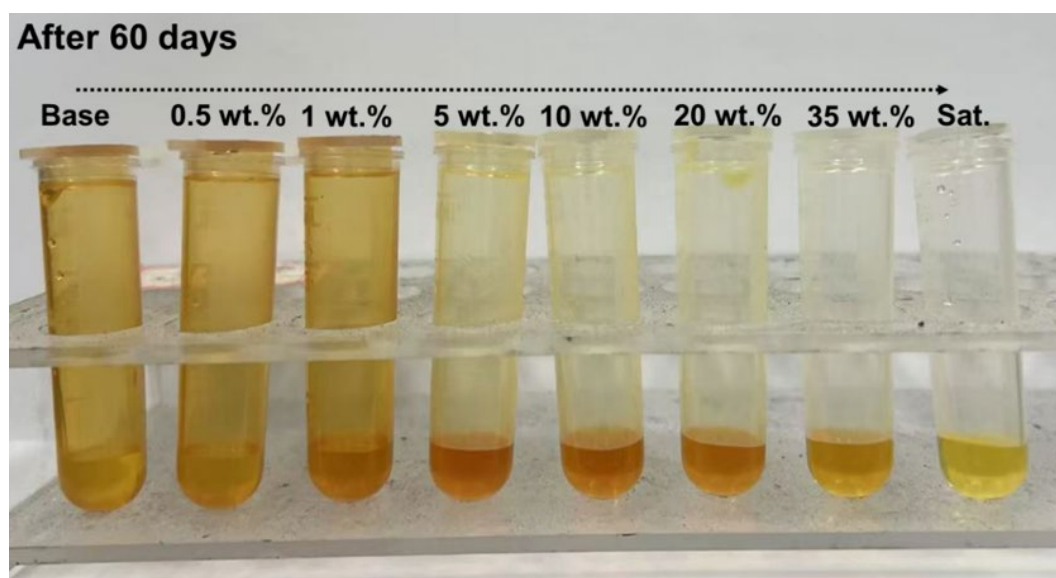

**Fig. S7** Digital photograph of mixed solutions containing different concentrations of Ect and  $I_3^-$  after 60 days of storage in plastic test tubes.

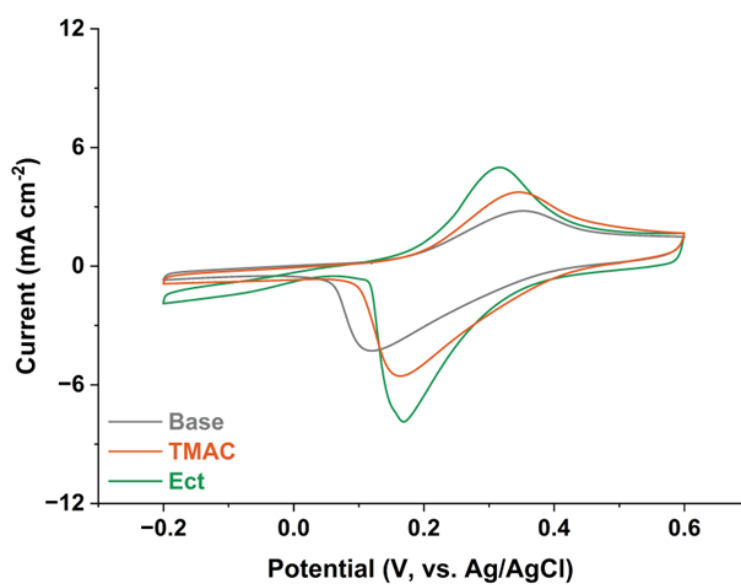

**Fig. S8** CV profiles for iodine conversion in base, TMAC and Ect electrolytes at  $1 \text{ mV s}^{-1}$

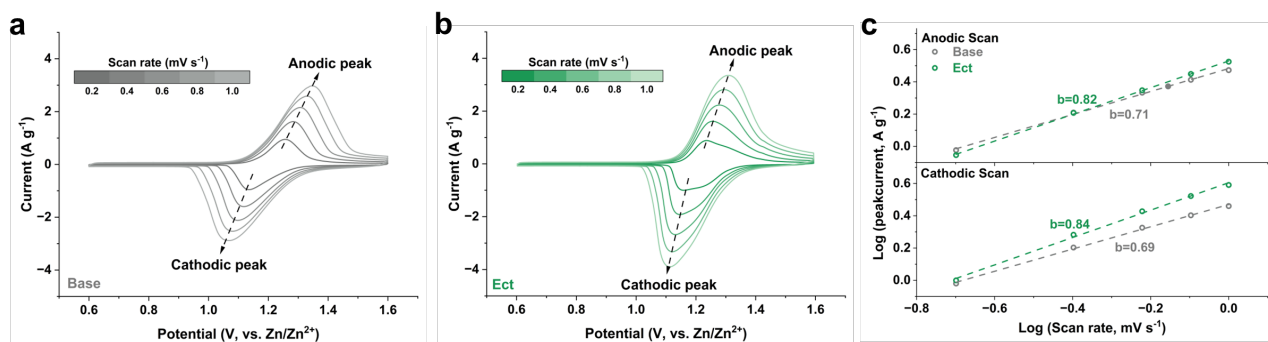

**Fig. S9** CV profiles of Zn–I<sub>2</sub> batteries using (a) base and (b) Ect electrolytes at different scan rates. (c) Log(i) vs. log(v) plots of the cathodic (top) and anodic (bottom) peak currents in both electrolytes.

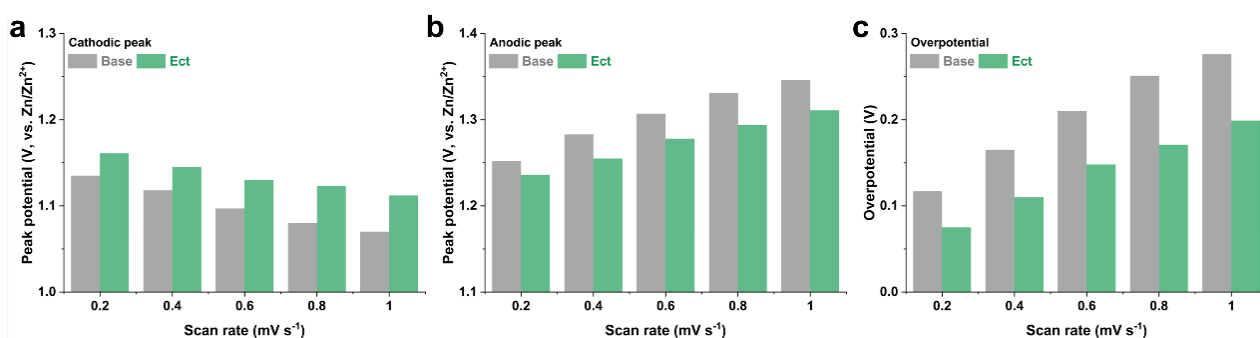

**Fig. S10** (a) Cathodic and (b) anodic peak potentials from the CV profiles of Zn–I<sub>2</sub> batteries at different scan rates. (c) Comparison of overpotentials in different electrolytes at various scan rates. Overpotential is defined as the difference between anodic and cathodic peak potentials.

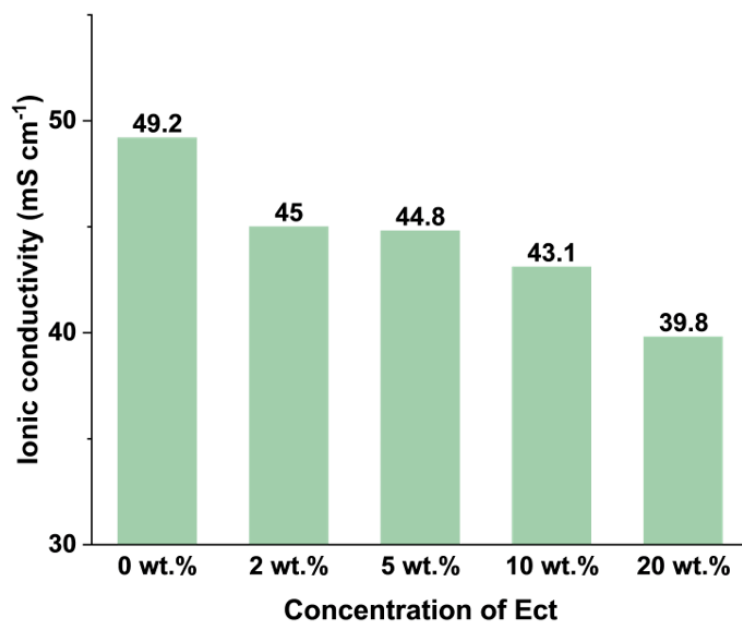

**Fig. S11** Ionic conductivities of 2 M ZnSO<sub>4</sub> electrolytes with different Ect concentrations.

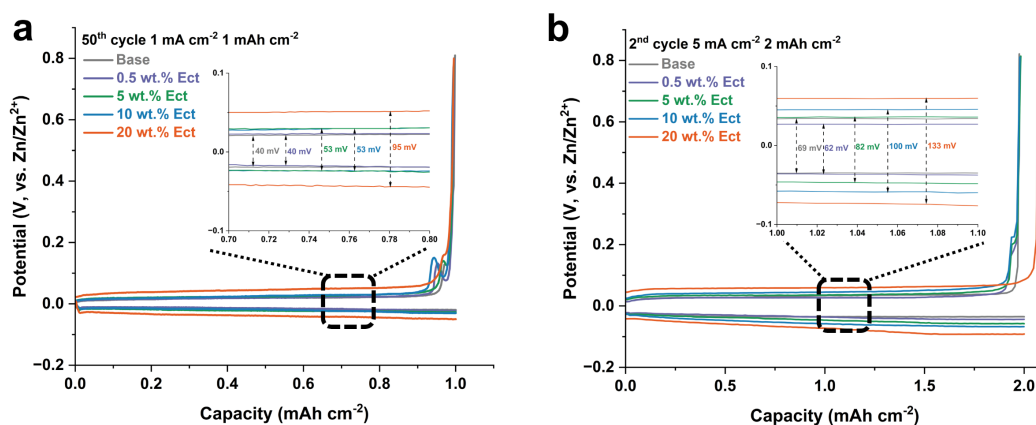

**Fig. S12** Zn plating/stripping GCD curves of Zn||Cu cells using electrolytes with different Ect concentrations at: (a) 50<sup>th</sup> cycle at 1 mA cm<sup>-2</sup>, 1 mAh cm<sup>-2</sup>. (b) 2<sup>nd</sup> cycle at 5 mA cm<sup>-2</sup>, 2 mAh cm<sup>-2</sup> (insets: comparison of overpotential from the selected region of the GCD curves).

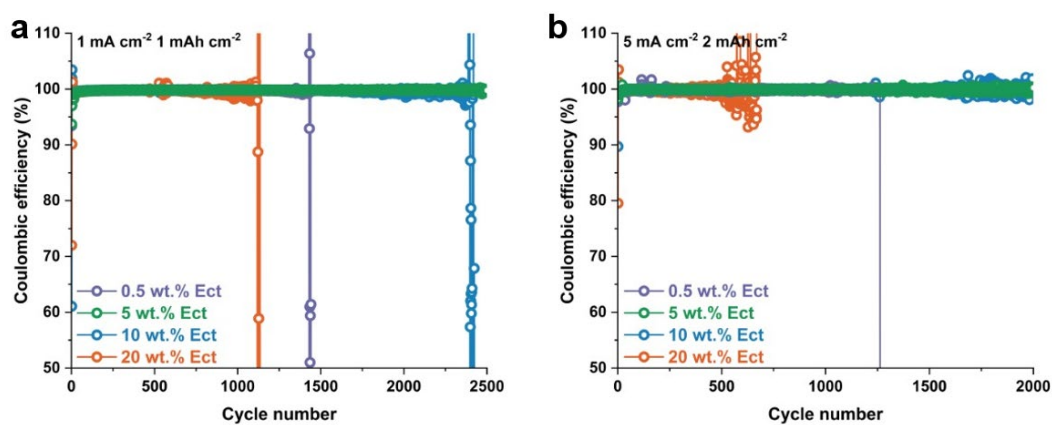

**Fig. S13** CEs of Zn||Cu cells using electrolytes with different Ect concentrations at (a) 1 mA cm<sup>-2</sup>, 1 mAh cm<sup>-2</sup> and (b) 5 mA cm<sup>-2</sup>, 2 mAh cm<sup>-2</sup>.

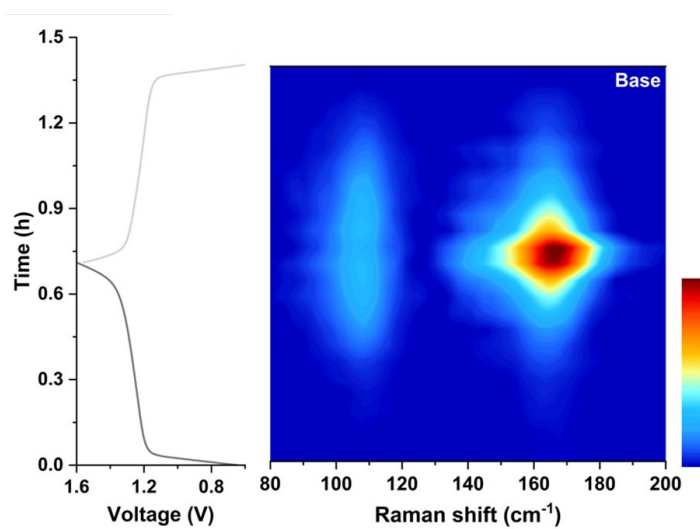

**Fig. S14** *In situ* Raman spectra of the Zn-I<sub>2</sub> battery using base electrolyte.

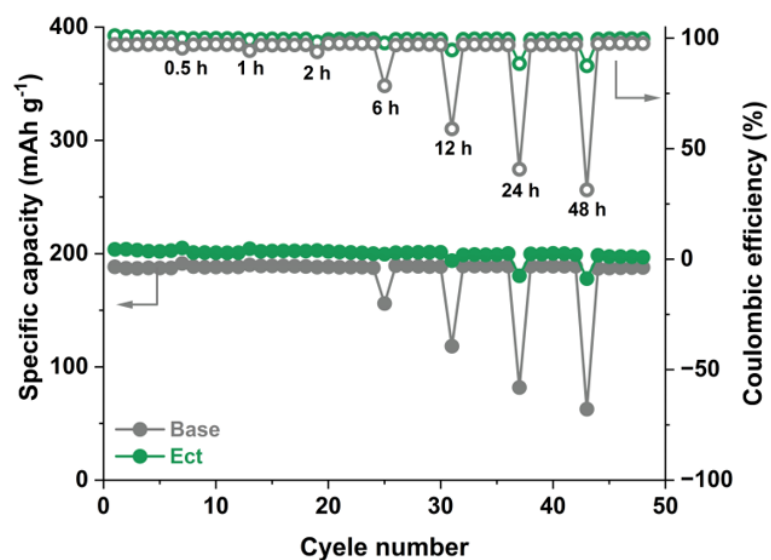

**Fig. S15** Self-discharge performance of Zn-I<sub>2</sub> coin cells using base and Ect electrolytes.

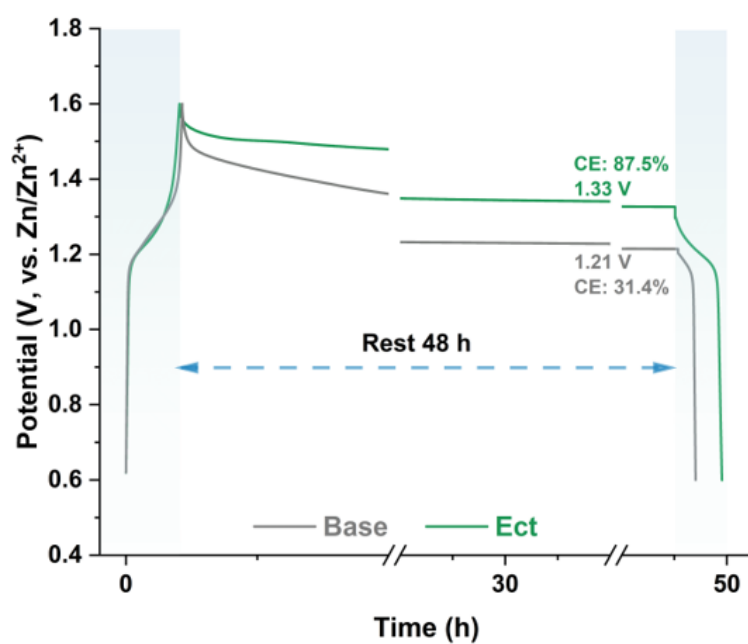

**Fig. S16** Self-discharge curves of Zn-I<sub>2</sub> coin cells over 48 h of resting time.

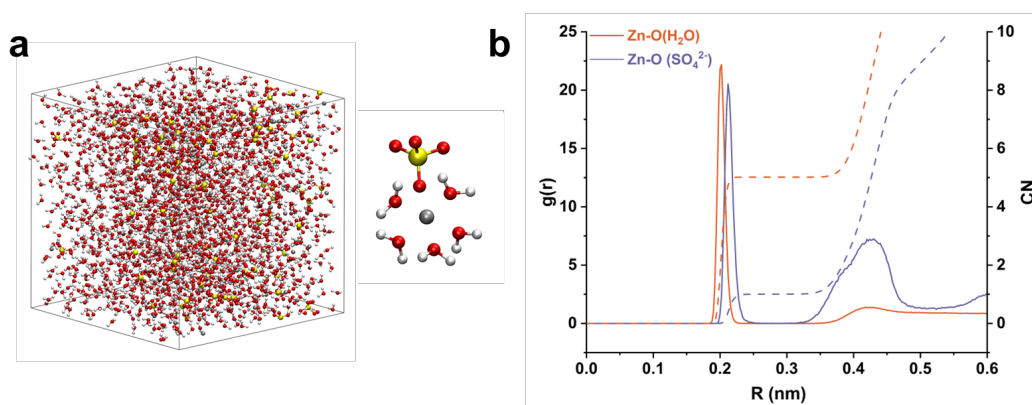

**Fig. S17** (a) Snapshot of the base electrolyte obtained from AIMD simulations, with an enlarged view of the  $\text{Zn}^{2+}$  solvation structure. (b) RDFs for  $\text{Zn}^{2+}$ -O ( $\text{H}_2\text{O}$ ) and  $\text{Zn}^{2+}$ -O ( $\text{SO}_4^{2-}$ ) collected from AIMD simulations in the base electrolyte.

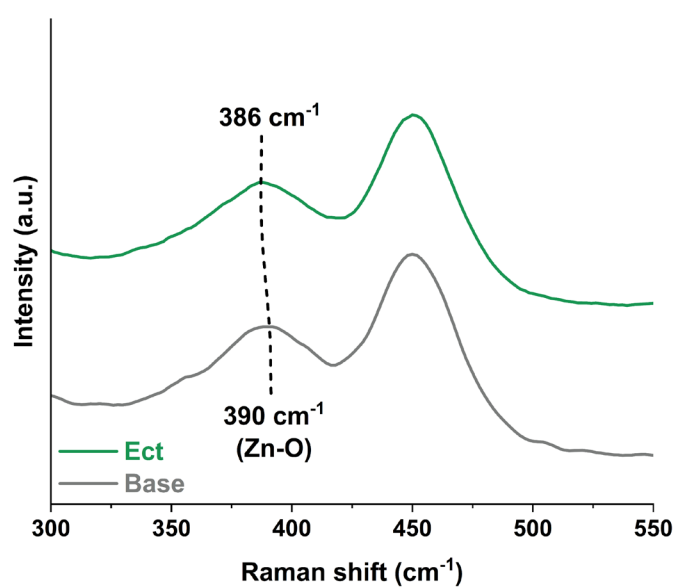

**Fig. S18** Raman spectra of the base and Ect electrolytes in the 300–550  $\text{cm}^{-1}$  region.

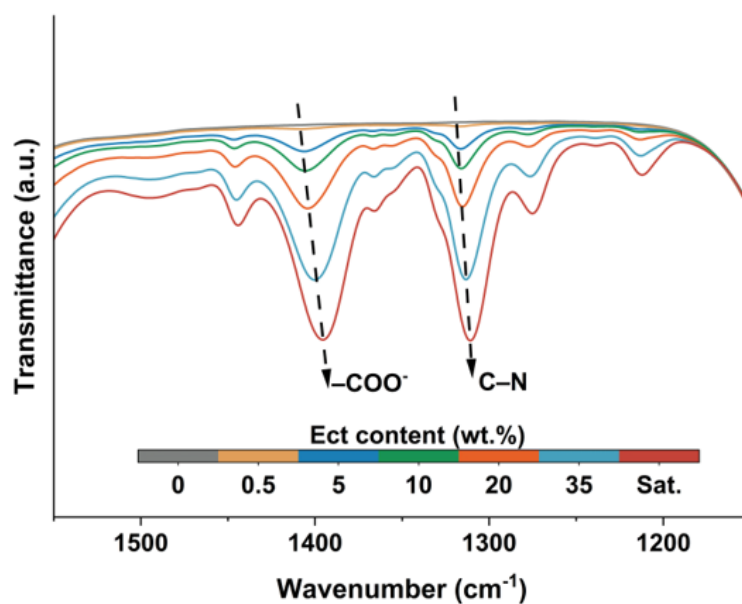

**Fig. S19** ATR-FTIR spectra of Ect electrolytes with varying Ect concentrations in the wavenumber range of 1550–1150  $\text{cm}^{-1}$ .

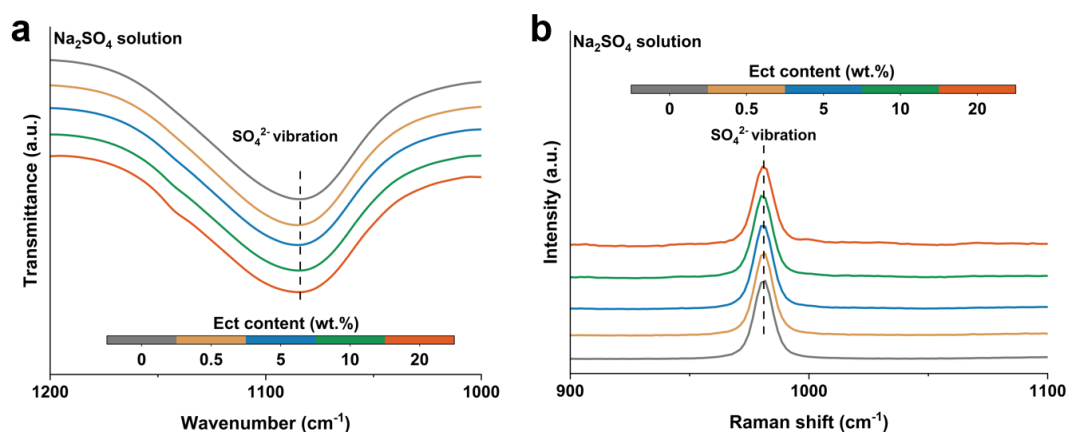

**Fig. S20** (a) FTIR spectra and (b) Raman spectra of 2 M  $\text{Na}_2\text{SO}_4$  solutions containing different concentrations of Ect.

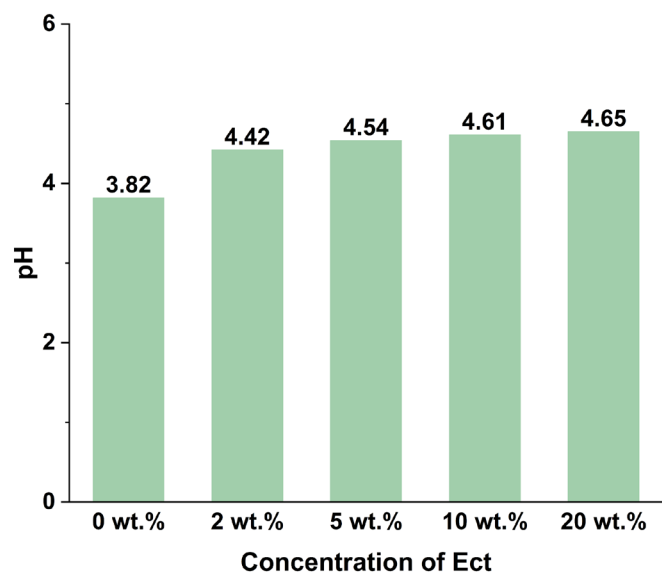

**Fig. S21** pH values of 2 M  $\text{ZnSO}_4$  electrolytes with different concentrations of Ect.

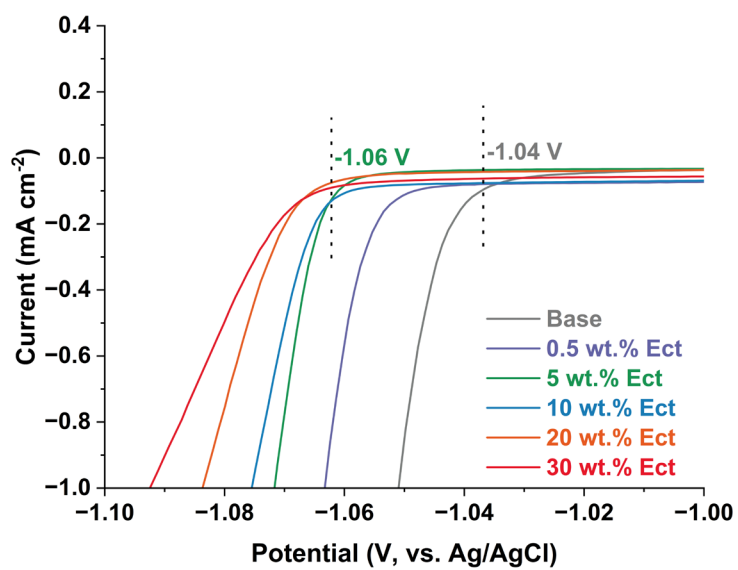

**Fig. S22** Electrochemical stability window of electrolytes with varying Ect concentrations at a scan rate of  $5 \text{ mV s}^{-1}$ .



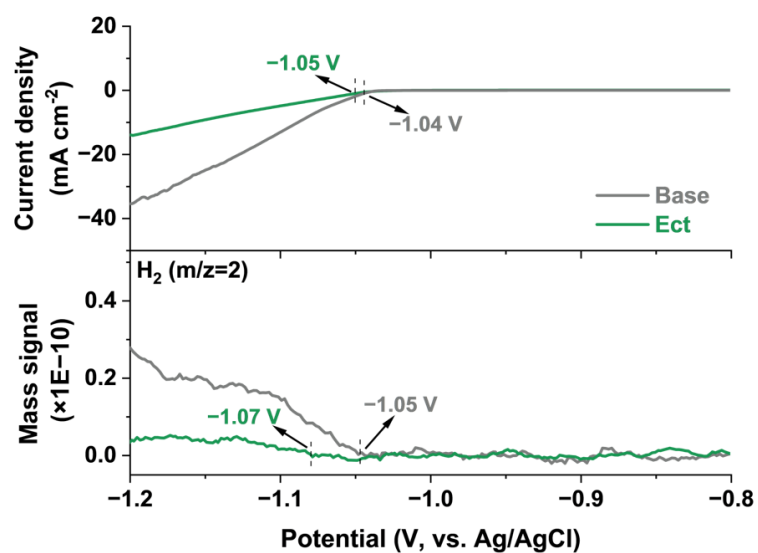

**Fig. S23** LSV curves (top) and corresponding *in situ* DEMS mass signal of  $H_2$  (bottom) measured from  $-0.8$  V to  $-1.2$  V (vs. Ag/AgCl).

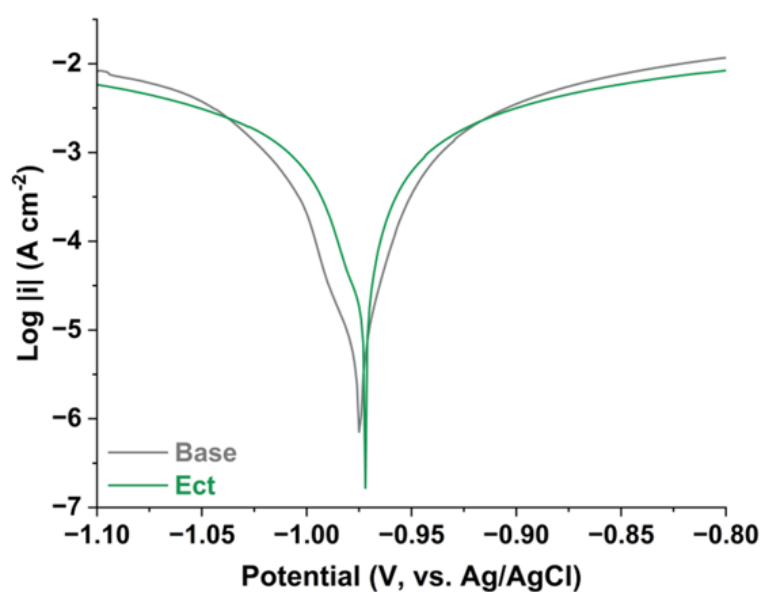

**Fig. S24** Tafel plots showing the corrosion behavior of Zn metal in base and Ect electrolytes.

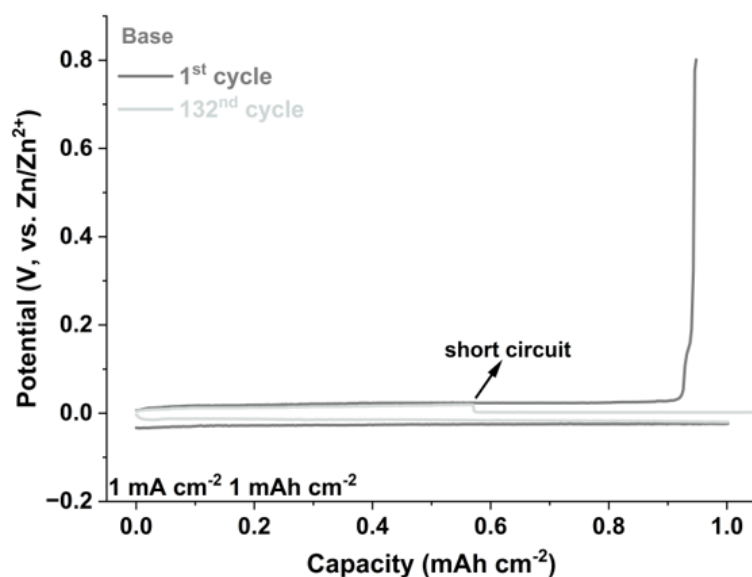

**Fig. S25** Zn plating/stripping GCD curves of Zn || Cu asymmetric cells at  $1 \text{ mA cm}^{-2}$ ,  $1 \text{ mAh cm}^{-2}$  using base electrolyte at 1<sup>st</sup> and 132<sup>nd</sup> cycles.

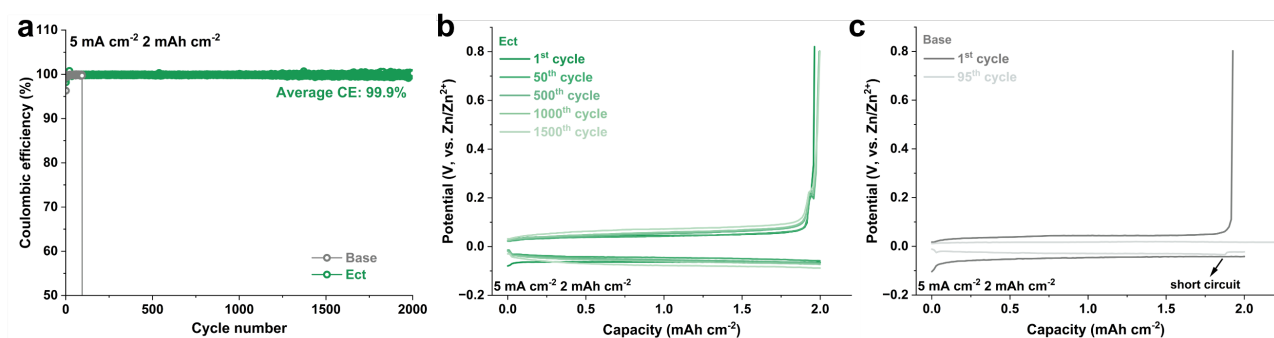

**Fig. S26** (a) CEs of Zn || Cu asymmetric cells using base and Ect electrolytes at  $5 \text{ mA cm}^{-2}$ ,  $2 \text{ mAh cm}^{-2}$ . Zn plating/stripping GCD curves of Zn || Cu cells using (b) Ect and (c) base electrolytes at different cycles.

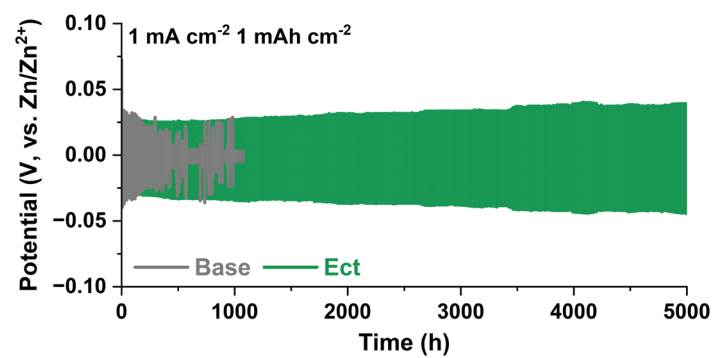

**Fig. S27** Comparison of cycling stability and voltage hysteresis of Zn||Zn symmetric cells under different current densities and areal capacities of  $1 \text{ mA cm}^{-2}$ ,  $1 \text{ mAh cm}^{-2}$ .

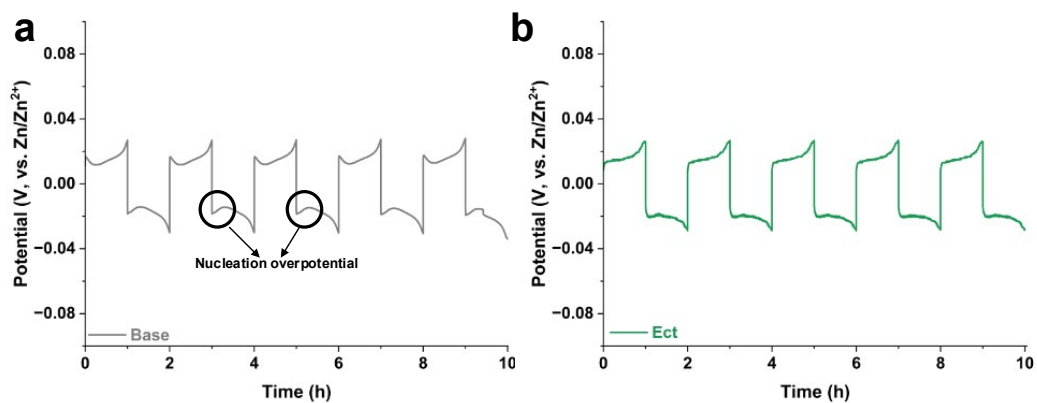

**Fig. S28** Overpotential evolution of Zn||Zn symmetric cells using (a) base and (b) Ect electrolyte.

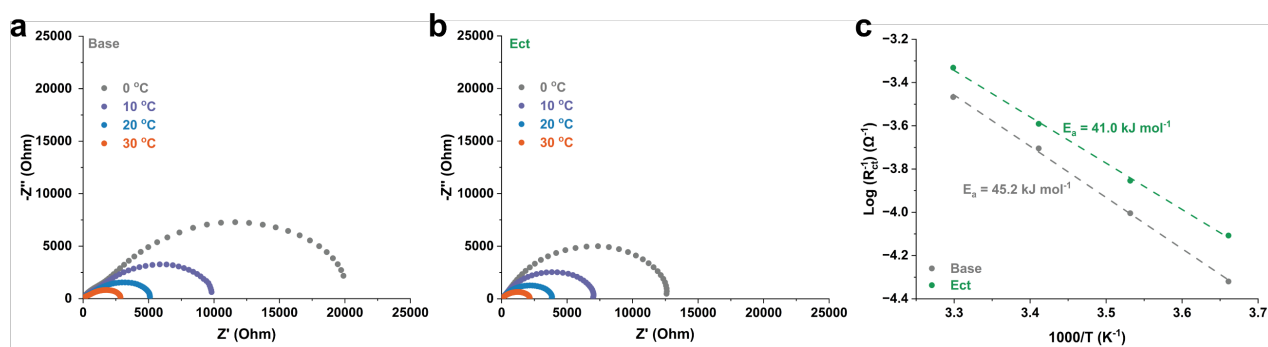

**Fig. S29** Nyquist plots of Zn||Zn symmetric cells at different temperatures in (a) base and (b) Ect electrolytes. (c) Corresponding Arrhenius plots and comparison of desolvation energies of Zn||Zn symmetric cells in the two electrolytes.

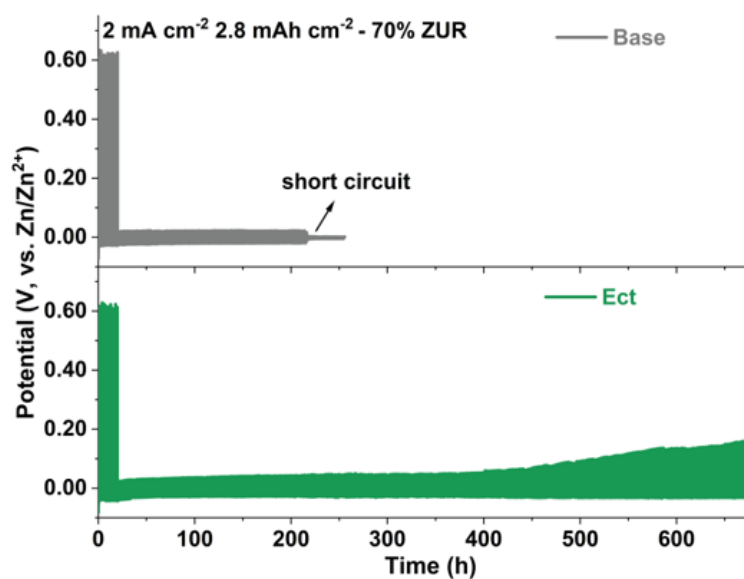

**Fig. S30** Galvanostatic Zn plating/stripping in a Zn||Cu asymmetric cell at 2 mA cm<sup>-2</sup> and 2.8 mAh cm<sup>-2</sup> under 70% ZUR, with a pre-deposited Zn of 4 mAh cm<sup>-2</sup>.

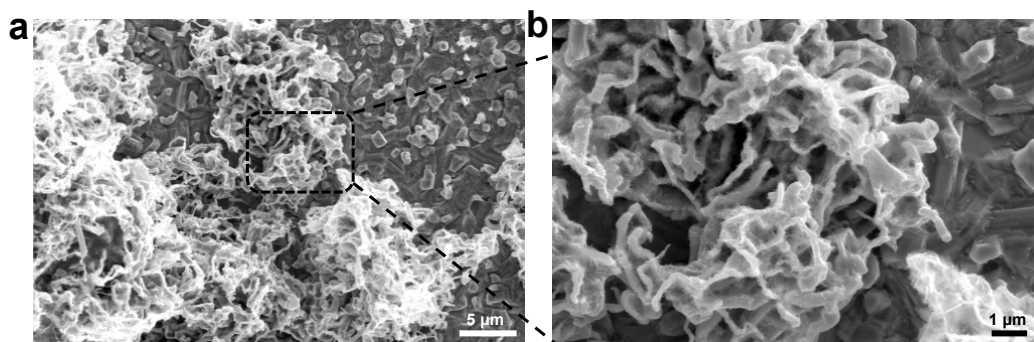

**Fig. S31** Top-view SEM images of Zn deposition morphology in base electrolyte at  $2 \text{ mA cm}^{-2}$  and  $4 \text{ mAh cm}^{-2}$  at (a) low magnification and (b) high magnification.

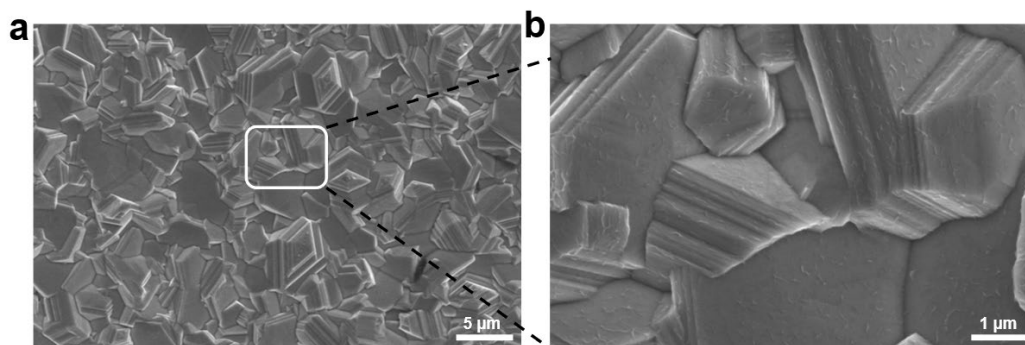

**Fig. S32** Top-view SEM images of Zn deposition morphology in Ect electrolyte at  $2 \text{ mA cm}^{-2}$  and  $4 \text{ mAh cm}^{-2}$  at (a) low magnification and (b) high magnification.

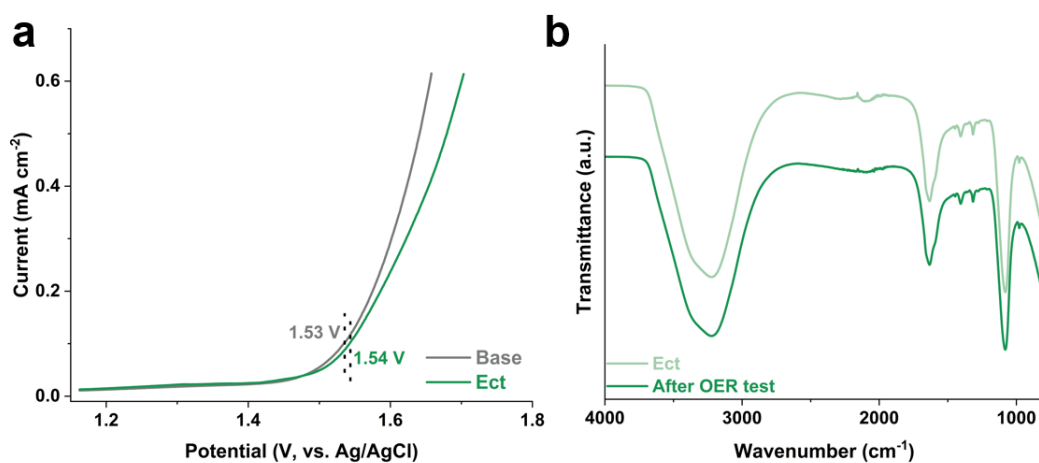

**Fig. S33** (a) LSV profiles of the base and Ect electrolytes for oxidation stability evaluation (scan rate: 5 mV s<sup>-1</sup>). (b) FTIR spectra of the Ect electrolyte collected before and after the anodic stability test.

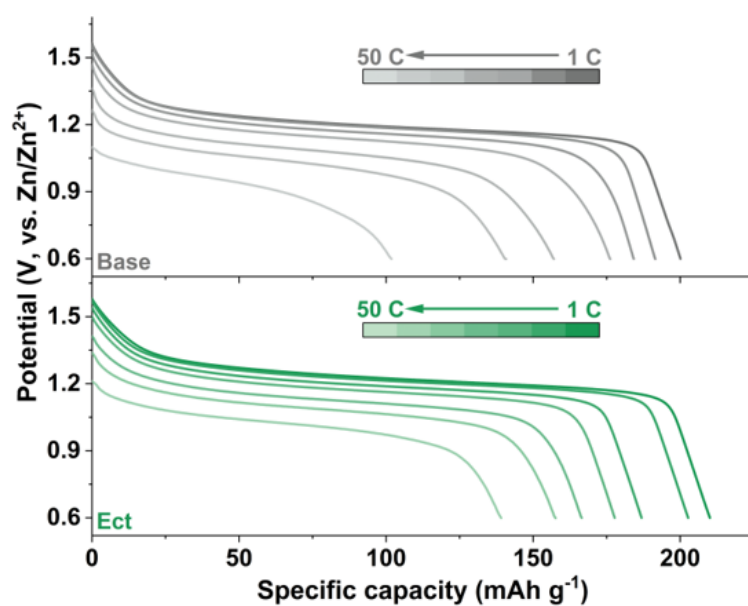

**Fig. S34** GCD curves of Zn-I<sub>2</sub> batteries at different current densities.

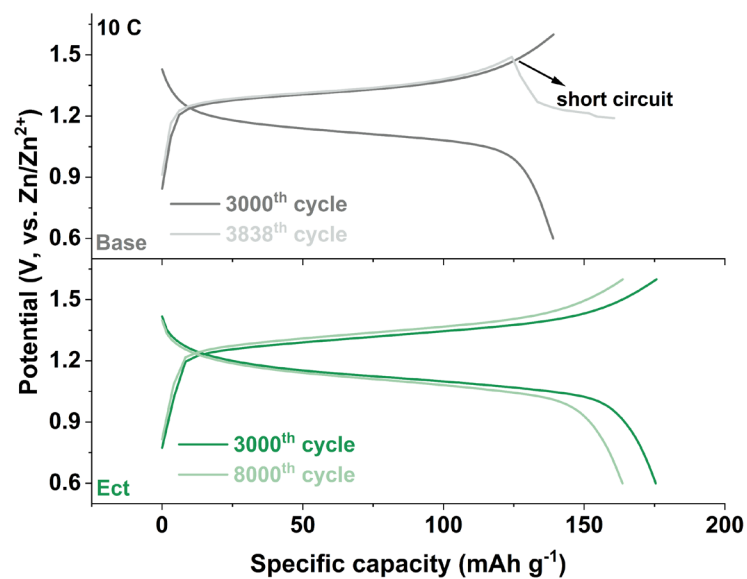

**Fig. S35** GCD curves of Zn-I<sub>2</sub> batteries using different electrolytes at 10 C.

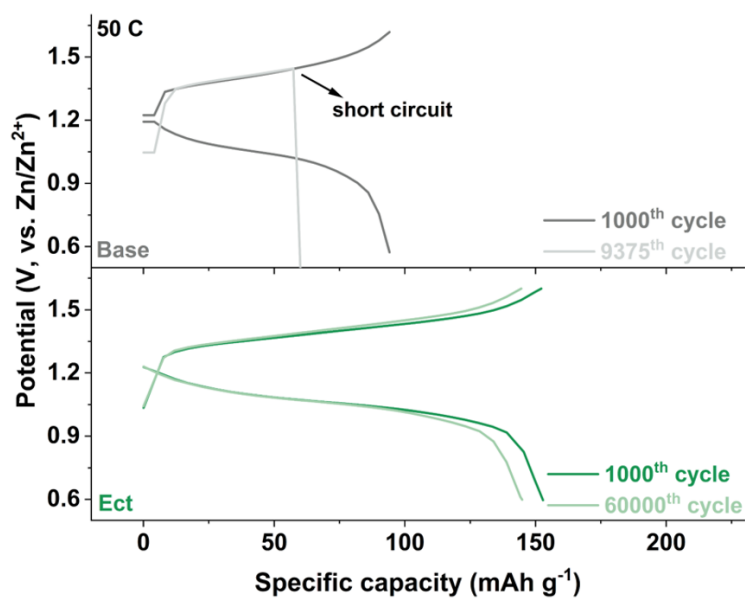

**Fig. S36** GCD curves of Zn-I<sub>2</sub> batteries using different electrolytes at 50 C.

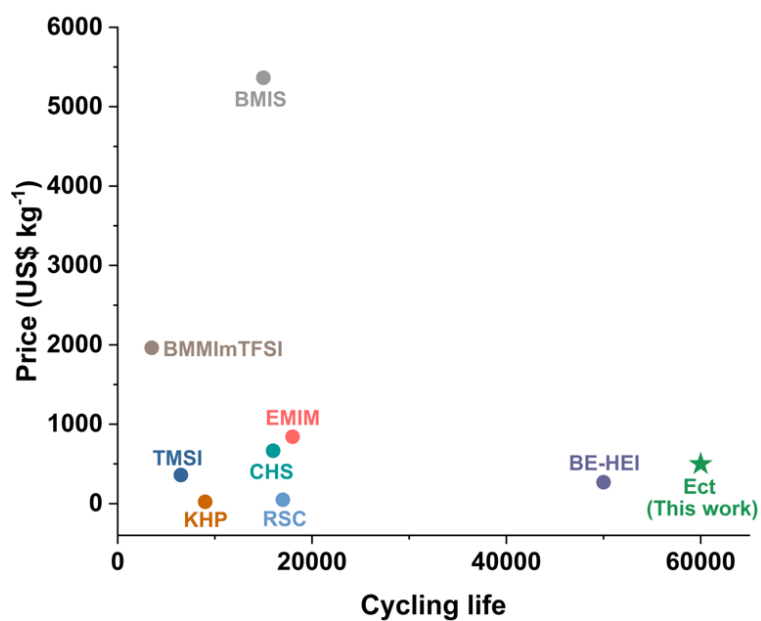

**Fig. S37** Comparison of raw-material prices and cycling life of this work with previously reported aqueous Zn-I<sub>2</sub> batteries.

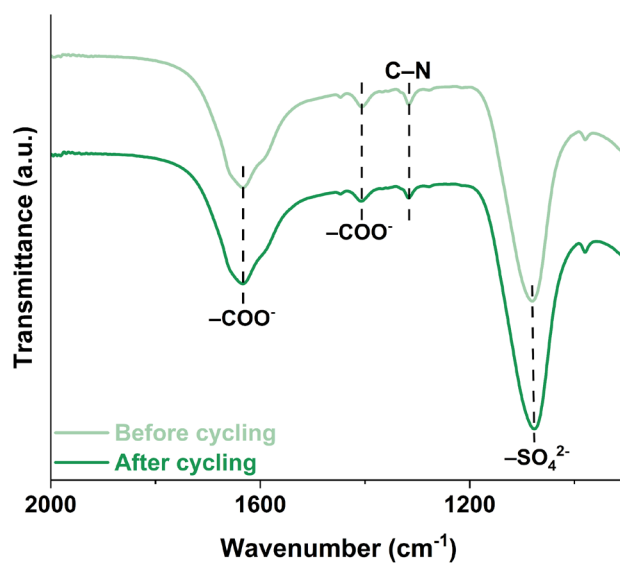

**Fig. S38** FTIR spectra of the Ect electrolyte collected before after cycling at 50 C in the wavenumber range of 2000–900 cm<sup>-1</sup>.



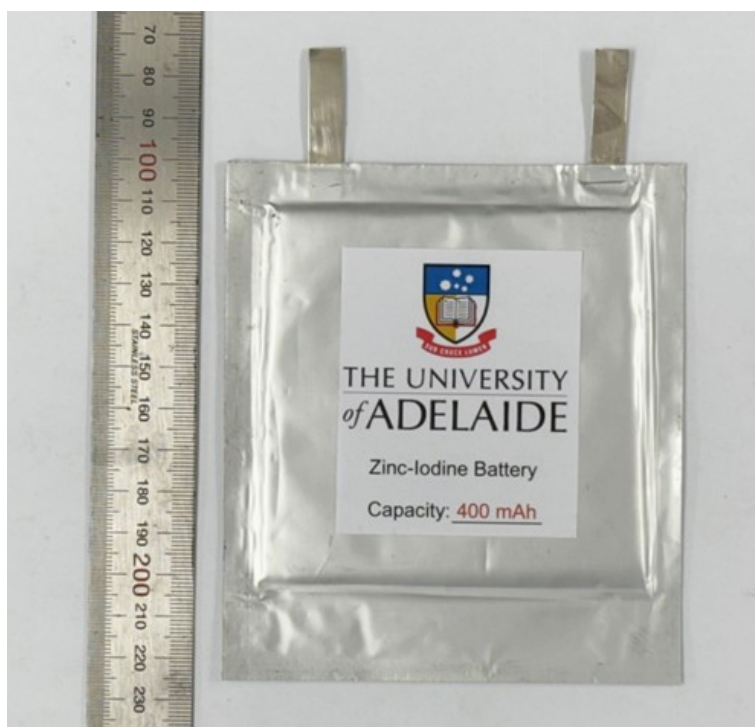

**Fig. S39** Digital photograph of the 400 mAh Zn-I<sub>2</sub> pouch cell.

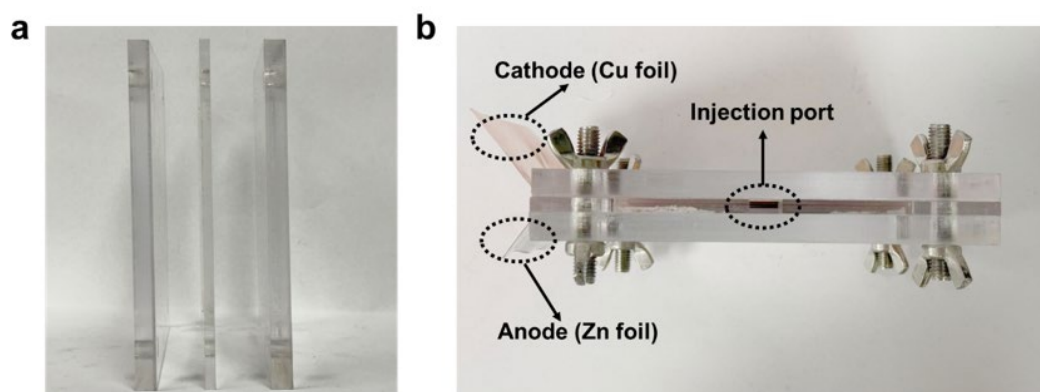

**Fig. S40** Digital photograph of the galvanizing bath used for Zn deposition in: (a) disassembled state and (b) assembled state.

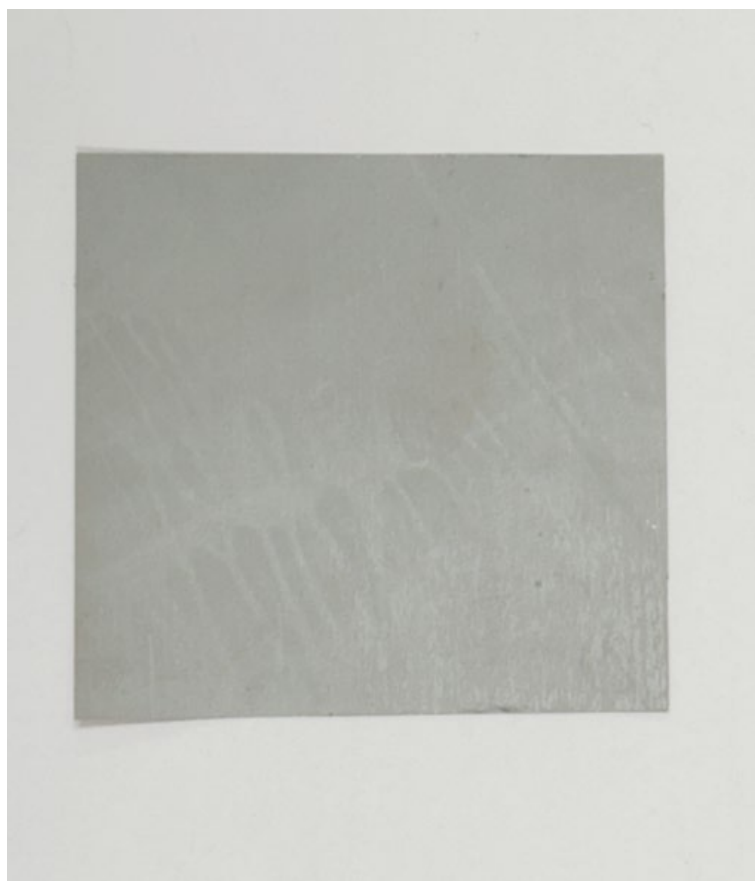

**Fig. S41** Digital photograph of Zn plated on a Cu foil at a current density of  $6.6 \text{ mA cm}^{-2}$  in the Ect electrolyte.

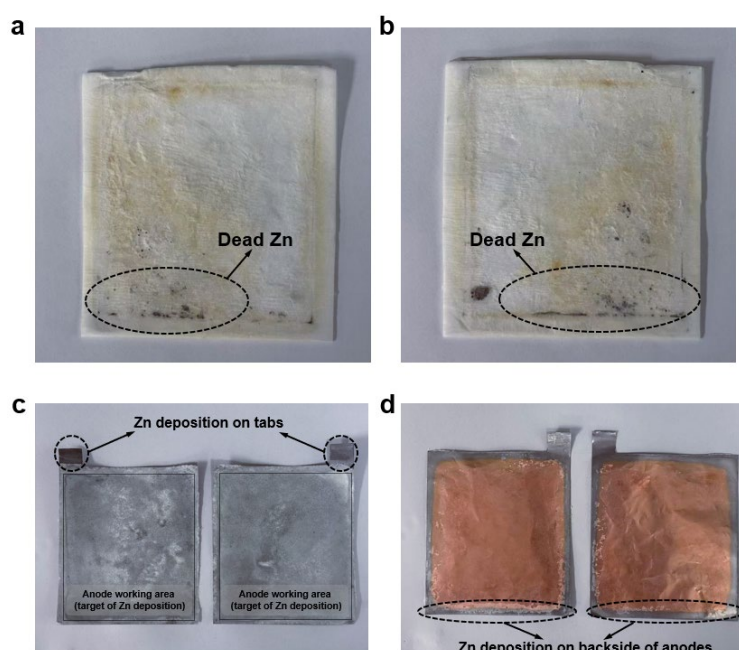

**Fig. S42** Digital photographs of (a) front side and (b) back side of glass-fiber separator and (c) front side and (d) back side of the Zn@Cu anode recovered from a disassembled pouch cell (ZUR = 65%) after 1,200 cycles.

**Table S1** Comparison of key performance parameters and cycling life of this work with representative Zn–I<sub>2</sub> coin cells reported recently

| Strategies                            | Loading<br>(mg <sub>iodine</sub> cm <sup>-2</sup> ) | Current density<br>(A g <sup>-1</sup> ) | Capacity<br>(mAh g <sup>-1</sup> ) | Cycling life                | Ref.             |
|---------------------------------------|-----------------------------------------------------|-----------------------------------------|------------------------------------|-----------------------------|------------------|
| <b>Ect</b>                            | <b>7.56</b>                                         | <b>10</b>                               | <b>140.2</b>                       | <b>~100%, 60,000 cycles</b> | <b>This work</b> |
| BE-HEI                                | 9.7                                                 | 2                                       | 122.2                              | 50.0%, 50,000 cycles        | 6                |
| Zn-PCA                                | 3                                                   | 10                                      | 162.7                              | 87.0%, 30,000 cycles        | 7                |
| MeOH-TI                               | 1.2                                                 | 10                                      | 115                                | 95.0%, 20,000 cycles        | 8                |
| LA133                                 | 7.82                                                | 2                                       | 129.44                             | 80.9%, 2,700 cycles         | 9                |
| PNC-1000                              | 6                                                   | 1                                       | 170                                | 89.0%, 10,000 cycles        | 10               |
| I <sub>2</sub> /OSTC                  | 4                                                   | 1                                       | 153                                | 85.0%, 10,000 cycles        | 11               |
| PC@Fe <sub>2</sub> N-4/I <sub>2</sub> | 4.5                                                 | 2                                       | 153                                | ~86.0%, 20,000 cycles       | 12               |
| Zn-CCS                                | 3                                                   | 2                                       | 115                                | ~90.0%, 15,000 cycles       | 13               |
| NiSAs-HPC                             | 1                                                   | 10                                      | 108                                | ~91.5%, 40,000 cycles       | 14               |
| M9                                    | 1.2                                                 | 2                                       | 161.9                              | ~92.5%, 10,000 cycles       | 15               |
| ZT-12/NS-20                           | 6.5                                                 | 1                                       | 133                                | ~78.2%, 5,000 cycles        | 16               |
| Co@AC                                 | 1                                                   | 1                                       | 112.3                              | 68.0%, 1,000 cycles         | 17               |
| KHP                                   | 2                                                   | 10                                      | 113.8                              | ~75.8%, 8,800 cycles        | 18               |
| c-CNFs                                | 13.9                                                | 2                                       | 130.5                              | 98.7%, 4,000 cycles         | 19               |
| Z@M-Zn                                | 6                                                   | 1                                       | 120                                | 86.1%, 2400 cycles          | 20               |

**Table S2** Comparison of additive prices and cycle life of this work with representative Zn–I<sub>2</sub> battery system reported recently

| Strategies | Cycling life | Price (USD kg <sup>-1</sup> ) | Supplier                                  | Ref.      | Price source                                                                                                        |
|------------|--------------|-------------------------------|-------------------------------------------|-----------|---------------------------------------------------------------------------------------------------------------------|
| Ect        | 60000        | 498                           | Hubei Hongjing Chemical Co., Ltd.         | This work | <a href="https://www.chemicalbook.com/SupplyInfo_481044.htm">https://www.chemicalbook.com/SupplyInfo_481044.htm</a> |
| TMSI       | 6500         | 360.11                        | TCI Shanghai                              | 21        | <a href="https://www.tcichemicals.com/CN/zh/p/T1056">https://www.tcichemicals.com/CN/zh/p/T1056</a>                 |
| BMMImTFSI  | 3500         | 1963                          | Macklin Inc.                              | 22        | <a href="https://www.macklin.cn/products/B857249">https://www.macklin.cn/products/B857249</a>                       |
| BE-HEI     | 50000        | 270.04                        | ACMEC                                     | 6         | <a href="https://www.acmec-e.com/product/h58360">https://www.acmec-e.com/product/h58360</a>                         |
| BMIS       | 15000        | 5364.7                        | ACMEC                                     | 23        | <a href="https://www.acmec-e.com/product/b93320">https://www.acmec-e.com/product/b93320</a>                         |
| EMIM       | 18000        | 842.57                        | Shanghai Amole Biotechnology Co., Ltd.    | 24        | <a href="https://www.amole.com.cn/product/PNOa218569.html">https://www.amole.com.cn/product/PNOa218569.html</a>     |
| RSC        | 17000        | 48.3                          | Macklin Inc.                              | 25        | <a href="https://www.macklin.cn/products/R817302">https://www.macklin.cn/products/R817302</a>                       |
| KHP        | 9000         | 22.7                          | Shanghai Kanglang Biotechnology Co., Ltd. | 18        | <a href="https://www.chemicalbook.com/SupplyInfo_520876.htm">https://www.chemicalbook.com/SupplyInfo_520876.htm</a> |
| CHS        | 16000        | 665.86                        | Shanghai Amole Biotechnology Co., Ltd.    | 26        | <a href="https://www.amole.com.cn/product/PNOA144965.html">https://www.amole.com.cn/product/PNOA144965.html</a>     |

**Table S3** Comparison of the practical application potential of this work with representative Zn–I<sub>2</sub> battery system reported recently

| Strategies                         | Areal Capacity<br>(mAh cm <sup>-2</sup> ) | Zn utilization (%) | Cycling life        | Ref.      |
|------------------------------------|-------------------------------------------|--------------------|---------------------|-----------|
| Ect                                | 6.95                                      | 80                 | 80.0%, 310 cycles   | This work |
| Ect                                | 7.1                                       | 65                 | 80.0%, 1,060 cycles | This work |
| cCNF/AC                            | 0.94                                      | 8.47               | ~89.8%, 400 cycles  | 27        |
| ZT-12/NS-20                        | 0.69                                      | 20                 | ~94.1%, 600 cycles  | 16        |
| MX-AB@I                            | 4                                         | 78.7               | 94.4%, 200 cycles   | 28        |
| PAH-PCH                            | 2.77                                      | 33.3               | 76.9%, 100 cycles   | 29        |
| AHE                                | 1.5                                       | 20                 | ~87.1%, 300 cycles  | 30        |
| BBAS                               | 2.33                                      | 33                 | 87.1%, 350 cycles   | 31        |
| ZS-EAc                             | 1.46                                      | 33                 | ~88.0%, 200 cycles  | 32        |
| Dowex+Fe-SCNT/GF                   | 3.6                                       | 20                 | ~85.7%, 800 cycles  | 33        |
| CCH                                | 1.5                                       | 35.7               | ~100%, 150 cycles   | 34        |
| Sb <sub>2</sub> O <sub>3</sub> @Zn | 3.9                                       | 14.7               | ~93.5%, 100 cycles  | 35        |
| ZSO+ACES–K(0.5)                    | 5.7                                       | 9.7                | 78.8%, 600 cycles   | 36        |
| ZSO+CsI                            | 2.26                                      | 17.8               | 54.8%, 100 cycles   | 37        |
| BMIS                               | 3.97                                      | 82                 | 94.1%, 150 cycles   | 23        |
| SP-ZnCl <sub>2</sub>               | 3.47                                      | 20                 | 95.0%, 1,000 cycles | 38        |

## Supplementary References

- 1 M. J. Frisch, G. W. Trucks, H. B. Schlegel, G. E. Scuseria, M. A. Robb, J. R. Cheeseman, G. Scalmani, V. Barone, G. A. Petersson, H. Nakatsuji, X. Li, M. Caricato, A. V. Marenich, J. Bloino, B. G. Janesko, R. Gomperts, B. Mennucci, H. P. Hratchian, J. V. Ortiz, A. F. Izmaylov, J. L. Sonnenberg, D. Williams-Young, F. Ding, F. Lipparini, F. Egidi, J. Goings, B. Peng, A. Petrone, T. Henderson, D. Ranasinghe, V. G. Zakrzewski, J. Gao, N. Rega, G. Zheng, W. Liang, M. Hada, M. Ehara, K. Toyota, R. Fukuda, J. Hasegawa, M. Ishida, T. Nakajima, Y. Honda, O. Kitao, H. Nakai, T. Vreven, K. Throssell, J. A. Montgomery Jr., J. E. Peralta, F. Ogliaro, M. J. Bearpark, J. J. Heyd, E. N. Brothers, K. N. Kudin, V. N. Staroverov, T. A. Keith, R. Kobayashi, J. Normand, K. Raghavachari, A. P. Rendell, J. C. Burant, S. S. Iyengar, J. Tomasi, M. Cossi, J. M. Millam, M. Klene, C. Adamo, R. Cammi, J. W. Ochterski, R. L. Martin, K. Morokuma, O. Farkas, J. B. Foresman and D. J. Fox, Gaussian 16 (Revision C.01), Gaussian Inc., Wallingford, CT, 2016.
- 2 A. D. Becke, *J. Chem. Phys.*, 1993, **98**, 5648–5652.
- 3 F. Weigend and R. Ahlrichs, *Phys. Chem. Chem. Phys.*, 2005, **7**, 3297.
- 4 S. Grimme, J. Antony, S. Ehrlich and H. Krieg, *J. Chem. Phys.*, 2010, **132**, 154104.
- 5 E. R. Johnson and A. D. Becke, *J. Chem. Phys.*, 2005, **123**, 024101.
- 6 J. Chen, G. Ou, P. Liu, W. Fan, B. Li, Z. Hu, Z. Wen, Y. Zhang, Y. Tang, X. Liu, M. Ye and C. C. Li, *Angew. Chem. Int. Ed.*, 2025, **64**, e202414166.
- 7 F. Wang, W. Liang, X. Liu, T. Yin, Z. Chen, Z. Yan, F. Li, W. Liu, J. Lu, C. Yang and Q.-H. Yang, *Adv. Energy Mater.*, 2024, **14**, 2400110.
- 8 W. Deng, R. Feng and X. Wang, *Energy Environ. Sci.*, 2024, **17**, 8643–8657.
- 9 K. Wang, H. Li, Z. Xu, Y. Liu, M. Ge, H. Wang, H. Zhang, Y. Lu, J. Liu, Y. Zhang, Y. Tang and S. Chen, *Adv. Energy Mater.*, 2024, **14**, 2304110.
- 10 T. Liu, H. Wang, C. Lei, Y. Mao, H. Wang, X. He and X. Liang, *Energy Storage Mater.*, 2022, **53**, 544–551.
- 11 M. Chen, W. Zhu, H. Guo, Z. Tian, L. Zhang, J. Wang, T. Liu, F. Lai and J. Huang, *Energy Storage Mater.*, 2023, **59**, 102760.
- 12 Q. Chen, S. Chen, J. Ma, S. Ding and J. Zhang, *Nano Energy*, 2023, **117**, 108897.
- 13 Z. Hu, X. Wang, W. Du, Z. Zhang, Y. Tang, M. Ye, Y. Zhang, X. Liu, Z. Wen and C. C. Li, *ACS Nano*, 2023, **17**, 23207–23219.
- 14 L. Ma, G. Zhu, Z. Wang, A. Zhu, K. Wu, B. Peng, J. Xu, D. Wang and Z. Jin, *Nano Lett.*, 2023, **23**, 5272–5280.
- 15 X. Guo, H. Xu, Y. Tang, Z. Yang, F. Dou, W. Li, Q. Li and H. Pang, *Adv. Mater.*, 2024, **36**, 2408317.
- 16 R. Wang, Z. Liu, J. Wan, X. Zhang, D. Xu, W. Pan, L. Zhang, H. Li, C. Zhang and Q. Zhang, *Adv. Energy Mater.*, 2024, **14**, 2402900.
- 17 L. Zhu, X. Guan, Y. Fu, Z. Zhang, Y. Li, Q. Mai, C. Zhang, Z. Yuan, Y. Wang, P. Li, H. Li, D. Su, B. Jia, H. Yu, Y. Sun and T. Ma, *Adv. Funct. Mater.*, 2024, **34**, 2409099.
- 18 H. Fu, S. Huang, T. Wang, J. Lu, P. Xiong, K. Yao, J. S. Byun, W. Li, Y. Kim and H. S. Park, *Adv. Mater.*, 2025, **37**, 2411686.
- 19 H. Qu, W. Guo, W. Li, L. Shao, Y. Chen, S. Su, L. Hang and G. Jiang, *Appl. Surf. Sci.*, 2025, **686**, 162180.
- 20 J. Liu, S. Chen, W. Shang, J. Ma and J. Zhang, *Adv. Funct. Mater.*, 2025, **35**, 2422081.
- 21 X. Liao, Z. Zhu, Y. Liao, K. Fu, Y. Duan, L. Lv, L. Wu, W. Wang, X. He, K. Yang, P. Tian, W. Cai, C. Zhao,

- H. Tang and L. He, *Adv. Energy Mater.*, **14**, 2402306.
- 22 L. Zhao, D. Yin, Y. Zhang, B. Li, S. Wang, X. Cui, J. Feng, N. Gao, X. Liu, S. Ding and H. Zhao, *Energy Environ. Sci.*, 2025, **18**, 8952–8963.
- 23 H. Wu, J. Hao, S. Zhang, Y. Jiang, Y. Zhu, J. Liu, K. Davey and S.-Z. Qiao, *J. Am. Chem. Soc.*, 2024, **146**, 16601–16608.
- 24 T. Xiao, J.-L. Yang, B. Zhang, J. Wu, J. Li, W. Mai and H. J. Fan, *Angew. Chem. Int. Ed.*, 2024, **63**, e202318470.
- 25 Z. Chen, X. Gao, L. Shan, Q. Fu, Z. Xing, P. Rao, Z. Kang, X. Shi, W. Zhang and X. Tian, *Energy Environ. Sci.*, 2025, **18**, 8768–8779.
- 26 T. Su, W. Ren, M. Xu, P. Xu, J. Le, X. Ji, H. Dou, R. Sun and Z. Chen, *Adv. Energy Mater.*, **14**, 2401737.
- 27 Z. Li, W. Cao, T. Hu, Y. Hu, R. Zhang, H. Cui, F. Mo, C. Liu, C. Zhi and G. Liang, *Angew. Chem. Int. Ed.*, 2024, **136**, e202317652.
- 28 D. Li, Y.-J. Zhu, L. Cheng, S. Xie, H.-P. Yu, W. Zhang, Z. Xu, M.-G. Ma and H. Li, *Adv. Energy Mater.*, 2025, **15**, 2404426.
- 29 J.-L. Yang, Z. Yu, J. Wu, J. Li, L. Chen, T. Xiao, T. Xiao, D.-Q. Cai, K. Liu, P. Yang and H. J. Fan, *Adv. Mater.*, 2023, **35**, 2306531.
- 30 Q. Liu, Z. Yu, K. Fan, H. Huang and B. Zhang, *ACS Nano*, 2024, **18**, 22484–22494.
- 31 Y. Liu, F. Li, J. Hao, H. Li, S. Zhang, J. Mao, T. Zhou, R. Wang, L. Zhang and C. Zhang, *Adv. Funct. Mater.*, 2024, **34**, 2400517.
- 32 T. Xiao, J.-L. Yang, B. Zhang, J. Wu, J. Li, W. Mai and H. J. Fan, *Angew. Chem. Int. Ed.*, 2024, **63**, e202318470.
- 33 Y. Kang, G. Chen, H. Hua, M. Zhang, J. Yang, P. Lin, H. Yang, Z. Lv, Q. Wu, J. Zhao and Y. Yang, *Angew. Chem. Int. Ed.*, 2023, **62**, e202300418.
- 34 J. L. Yang, T. Xiao, T. Xiao, J. Li, Z. Yu, K. Liu, P. Yang and H. J. Fan, *Adv. Mater.*, 2024, **36**, e2313610.
- 35 P. Xiao, Y. Wu, K. Liu, X. Feng, J. Liang, Y. Zhao, C. Wang, X. Xu, T. Zhai and H. Li, *Angew. Chem. Int. Ed.*, 2023, **135**, e202309765.
- 36 G. Qu, Y. Zhao, C. Li, Y. Zhai, Y. Kong, X. He, L. Kong, C. Wang, M. Chen, K. Song, Z. Liu and L. Xu, *Angew. Chem. Int. Ed.*, 2025, **64**, e202422036.
- 37 Y. Deng, Z. Xiao, D. Liu, S. Wu, J. Zou, Z. Jiang and Y. Li, *J. Alloys Compd.*, 2025, **1012**, 178424.
- 38 S.-J. Zhang, J. Hao, H. Wu, Q. Chen, C. Ye and S.-Z. Qiao, *Adv. Mater.*, 2024, **36**, 2404011.
